# Supplementary material for: Fabrication of flexible reduced graphene oxide–TiO2 freestanding films for supercapacitor application
Source: Royal Society of Chemistry journal article supplement (doi:10.1039/c4ra12980f), 2015-01-01
Supplement: c4ra12980f1.pdf [file c4ra12980f1.pdf]

Electronic supplementary information

## Fabrication of Flexible Reduced Graphene Oxide-TiO<sub>2</sub> Freestanding Films for Supercapacitor Application

Jinsu Kim<sup>a</sup>, Wai-Hwa Khoh<sup>a</sup>, Boon-Hong Wee<sup>a</sup>, and Jong-Dal Hong<sup>\*a,b</sup>

<sup>a</sup> Department of Chemistry, <sup>b</sup> Research Institute for Natural Sciences, Incheon National University,

119 Academy-ro Yeonsu-gu, Incheon 406-772, Republic of Korea

E-mail: hong5506@incheon.ac.kr

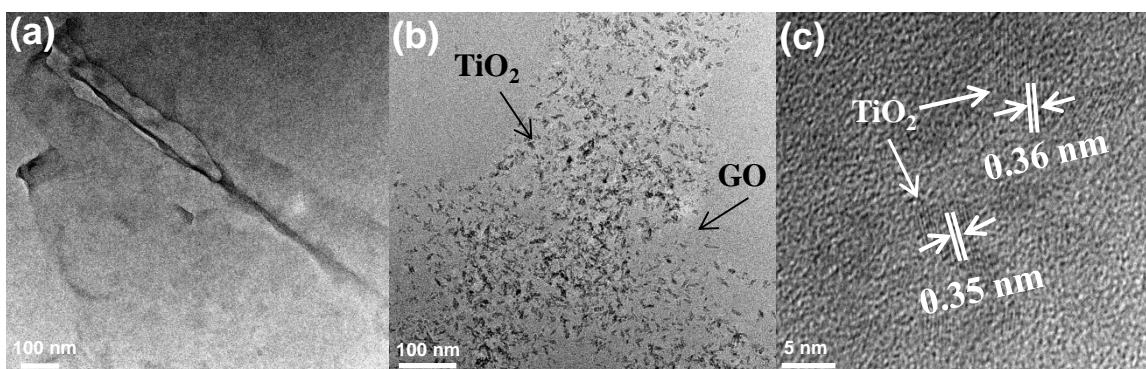

Figure S1: TEM image of (a) GO sheet, (b) low magnification and (c) high magnification of TiO<sub>2</sub> nanoparticles grown on GO sheet before annealing treatment.

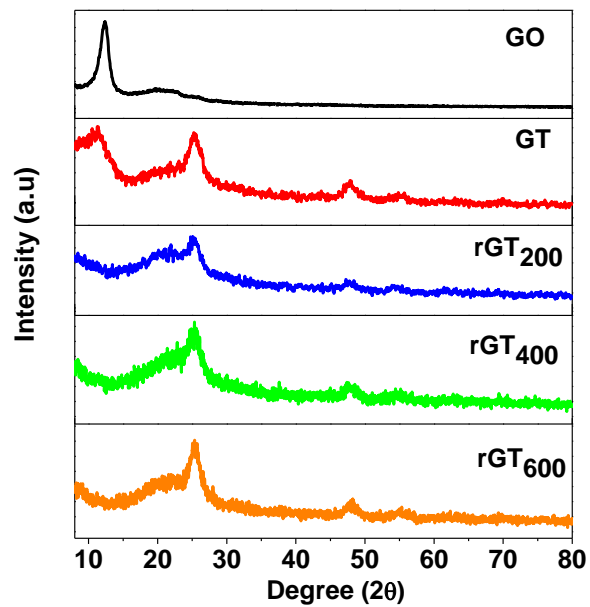

Fig. S2. XRD patterns of GO and GT annealing at different temperatures.

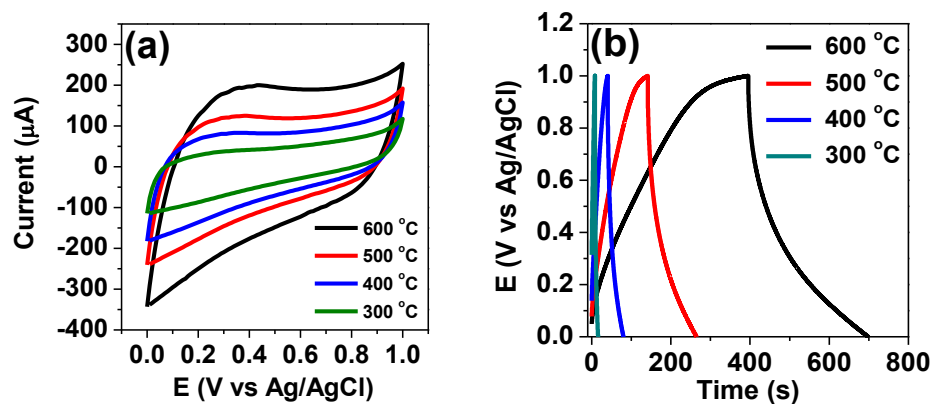

Fig. S3. (a) CV curve of rGT electrodes reduced at different temperatures at scan rate of 50 mV/s in 1.0 M Na<sub>2</sub>SO<sub>4</sub> (b) Galvanostatic charge/discharge curves of rGT electrodes reduced at different temperatures at current density of 1 A/g in 1.0 M Na<sub>2</sub>SO<sub>4</sub>.
